# Supplementary material for: Validity and reliability of the Chinese version of the Jenkins Sleep Scale among university students in China
Source: PeerJ. 2025 Jul 8;13:e19657. doi: 10.7717/peerj.19657 (PMC12248221; doi:10.7717/peerj.19657)
Supplement: Supplemental Information 1 [file peerj-13-19657-s001.xlsx]

## Sheet: data sleep
Gender	S1	S2	S3	S4	Ssleep
2	1	1	1	2	5
2	0	0	1	1	2
2	1	0	0	1	2
1	1	0	0	0	1
2	1	0	0	1	2
1	0	0	1	1	2
2	0	0	0	1	1
2	3	0	1	1	5
2	0	1	0	1	2
2	1	1	1	1	4
1	0	0	0	0	0
2	0	0	0	0	0
2	1	2	4	4	11
2	0	0	0	2	2
1	0	0	0	0	0
2	0	0	0	1	1
2	0	0	0	0	0
2	2	1	3	2	8
1	2	0	5	2	9
2	1	0	2	1	4
2	3	0	3	2	8
2	0	1	1	1	3
2	2	1	2	1	6
2	0	0	0	0	0
2	1	0	0	1	2
1	2	1	1	2	6
1	1	2	2	3	8
2	1	0	0	1	2
2	0	0	3	1	4
2	2	2	2	2	8
2	0	0	0	0	0
2	1	1	2	2	6
2	0	0	0	1	1
2	3	3	2	1	9
2	1	0	0	1	2
2	0	0	1	1	2
2	0	1	0	0	1
1	0	0	0	1	1
1	0	0	0	0	0
1	1	1	0	0	2
2	0	0	0	1	1
2	2	1	1	3	7
2	0	0	1	1	2
2	4	0	4	1	9
2	0	0	0	2	2
2	0	0	0	1	1
2	0	0	0	0	0
2	0	0	0	0	0
2	1	0	1	1	3
1	2	2	2	2	8
2	0	1	0	0	1
2	2	4	3	1	10
1	3	3	3	3	12
1	0	0	0	3	3
2	1	0	1	0	2
2	3	2	4	2	11
1	2	3	3	3	11
2	0	0	0	0	0
2	0	0	0	0	0
2	0	0	1	2	3
1	2	2	2	4	10
1	0	0	0	0	0
1	3	3	3	3	12
1	1	3	1	2	7
1	0	0	0	0	0
2	2	1	1	1	5
1	2	2	2	3	9
1	3	0	2	2	7
2	2	1	0	0	3
1	1	1	1	1	4
1	2	0	1	0	3
1	1	1	2	3	7
2	1	1	2	1	5
1	0	0	0	0	0
1	3	3	3	3	12
1	1	1	1	2	5
2	1	1	1	1	4
1	1	2	2	2	7
1	2	1	5	3	11
1	2	2	2	1	7
1	3	3	3	3	12
1	1	1	1	1	4
1	1	2	1	1	5
2	1	0	0	0	1
1	0	0	0	0	0
2	2	2	2	3	9
2	0	0	0	0	0
2	1	0	0	0	1
1	0	1	0	0	1
1	2	1	0	0	3
1	0	0	0	0	0
2	4	4	4	4	16
2	2	2	2	0	6
2	2	2	2	1	7
2	3	2	2	1	8
1	4	0	0	0	4
2	1	1	1	3	6
2	0	0	0	0	0
2	0	0	0	0	0
1	2	1	2	1	6
2	2	1	2	2	7
1	3	3	3	3	12
1	3	2	2	3	10
2	0	0	0	0	0
2	1	2	3	1	7
2	2	4	3	2	11
2	2	3	2	2	9
2	1	0	0	0	1
2	2	2	2	3	9
1	1	0	1	0	2
2	0	1	1	1	3
1	2	1	1	1	5
2	2	2	2	2	8
1	1	2	2	1	6
2	1	0	0	2	3
1	0	0	0	0	0
2	3	5	5	5	18
1	2	2	2	2	8
2	2	2	2	2	8
2	1	0	0	0	1
1	2	2	2	1	7
1	0	0	0	0	0
2	5	5	5	5	20
1	0	1	1	1	3
1	0	0	0	0	0
2	0	0	0	0	0
2	2	1	2	2	7
2	0	1	0	2	3
2	3	2	2	2	9
2	3	2	4	3	12
1	3	2	2	3	10
1	0	0	0	0	0
2	1	1	1	1	4
1	1	1	1	1	4
2	1	1	1	1	4
2	0	0	0	0	0
2	2	2	2	2	8
1	1	1	1	1	4
2	1	0	0	0	1
2	3	0	0	0	3
1	5	5	5	5	20
2	2	1	1	2	6
2	2	1	2	2	7
2	2	2	2	2	8
2	0	0	0	0	0
1	2	2	2	1	7
1	2	1	1	3	7
2	1	0	1	1	3
2	2	1	1	1	5
2	0	0	0	0	0
2	0	0	0	0	0
1	1	0	0	1	2
1	1	0	0	1	2
1	0	0	0	1	1
1	5	5	5	3	18
1	0	0	0	0	0
1	0	0	0	0	0
1	1	2	4	3	10
1	0	1	0	1	2
2	0	0	0	0	0
1	1	1	1	1	4
1	2	1	2	2	7
2	0	0	0	0	0
2	2	0	3	3	8
2	1	1	1	1	4
1	0	0	0	0	0
2	1	1	1	1	4
1	3	3	3	3	12
1	1	1	1	1	4
1	0	0	0	0	0
2	1	1	2	1	5
1	2	3	2	3	10
2	2	0	2	3	7
2	4	1	4	3	12
2	0	0	0	2	2
2	1	2	2	2	7
2	0	0	0	2	2
2	0	0	0	0	0
2	0	0	0	0	0
2	0	2	5	5	12
2	1	1	1	1	4
2	4	4	4	4	16
2	2	3	2	3	10
1	0	0	0	0	0
1	0	0	0	0	0
1	0	0	4	4	8
2	1	1	1	1	4
2	2	2	3	3	10
2	2	2	2	2	8
1	0	1	3	1	5
2	2	3	2	4	11
1	3	0	0	0	3
1	1	1	1	2	5
2	1	0	4	3	8
1	3	3	2	2	10
2	1	0	0	1	2
2	2	1	3	3	9
1	1	1	1	1	4
2	0	0	0	0	0
1	0	0	1	0	1
1	0	0	0	0	0
2	3	3	3	3	12
2	0	0	0	0	0
2	0	1	1	1	3
1	0	0	0	0	0
1	0	1	1	3	5
2	3	0	2	2	7
1	0	1	1	2	4
2	0	0	0	0	0
2	0	0	0	0	0
1	4	2	2	2	10
2	1	1	1	1	4
1	0	1	0	2	3
2	2	3	3	3	11
2	1	1	1	2	5
2	0	0	0	0	0
2	1	1	1	2	5
1	2	2	1	2	7
2	0	0	0	0	0
2	5	5	5	5	20
2	0	0	0	0	0
2	1	0	0	0	1
2	2	0	1	3	6
2	0	0	0	0	0
2	1	1	1	1	4
2	2	0	2	2	6
1	3	3	3	3	12
1	1	1	2	3	7
1	1	0	1	2	4
2	1	1	1	0	3
1	0	0	0	0	0
1	3	3	3	3	12
1	0	0	0	0	0
1	0	0	0	0	0
2	1	2	1	1	5
2	0	1	0	0	1
2	0	0	0	1	1
2	3	3	4	3	13
1	2	2	2	2	8
1	0	0	0	0	0
1	0	5	3	3	11
2	1	1	1	2	5
2	1	1	0	5	7
1	2	2	2	1	7
1	2	2	1	2	7
1	0	0	0	0	0
2	1	2	2	3	8
2	4	3	2	2	11
2	0	0	0	0	0
2	0	1	1	0	2
1	0	0	0	0	0
2	2	2	2	1	7
2	4	3	5	3	15
1	3	1	0	0	4
2	2	2	4	4	12
2	1	1	0	0	2
2	2	1	1	2	6
2	3	2	2	2	9
2	1	0	0	0	1
1	0	0	0	0	0
2	2	4	1	2	9
1	1	1	1	1	4
2	0	0	0	0	0
1	2	2	3	3	10
2	0	0	0	1	1
1	1	4	4	2	11
2	0	0	0	0	0
2	1	1	1	1	4
2	2	2	2	3	9
2	0	0	0	0	0
2	0	0	0	1	1
2	1	1	1	1	4
2	1	0	1	1	3
1	3	4	2	3	12
2	1	1	1	1	4
2	5	1	2	4	12
2	1	1	1	1	4
1	1	1	1	1	4
2	5	1	5	5	16
1	3	2	2	2	9
1	1	0	0	0	1
1	1	2	2	2	7
2	1	1	1	2	5
2	1	0	0	0	1
1	1	0	0	0	1
2	2	2	2	2	8
2	0	0	0	2	2
2	1	0	2	0	3
2	2	1	1	1	5
1	1	0	0	0	1
2	1	1	1	0	3
1	1	0	1	0	2
1	0	0	0	0	0
2	3	1	2	2	8
2	2	2	0	1	5
1	0	1	0	0	1
1	1	1	1	1	4
2	0	0	0	0	0
2	5	5	5	5	20
2	1	2	1	1	5
1	0	0	0	0	0
2	1	0	5	4	10
2	3	4	4	0	11
2	2	2	2	1	7
2	1	1	1	1	4
1	3	4	3	1	11
1	0	0	0	0	0
2	0	0	0	0	0
1	3	0	0	1	4
1	0	0	0	0	0
2	0	0	0	0	0
2	3	1	1	3	8
1	1	0	1	1	3
2	3	2	3	5	13
1	1	0	0	0	1
2	1	1	1	1	4
2	2	0	0	0	2
2	0	0	0	5	5
2	0	0	0	1	1
2	0	0	0	0	0
2	0	0	0	1	1
2	3	3	2	3	11
2	0	0	2	2	4
2	1	0	2	1	4
1	0	0	0	0	0
2	1	2	1	1	5
1	0	0	0	0	0
1	0	0	0	0	0
2	0	0	0	5	5
2	0	0	0	0	0
2	1	1	1	1	4
2	1	1	2	2	6
2	2	2	2	3	9
2	0	1	1	0	2
1	1	1	1	2	5
1	3	3	3	3	12
2	2	2	2	3	9
2	2	0	0	0	2
1	1	1	1	0	3
1	0	0	0	0	0
1	5	5	5	4	19
2	1	0	0	1	2
2	0	0	0	0	0
2	0	0	0	2	2
2	0	0	0	0	0
2	2	2	0	2	6
1	0	1	5	0	6
1	1	2	2	2	7
2	1	1	1	1	4
1	0	0	0	0	0
1	1	2	1	0	4
2	1	1	1	1	4
1	2	2	2	2	8
1	0	3	2	1	6
2	0	0	0	1	1
2	2	1	2	4	9
1	0	0	0	0	0
1	0	0	0	0	0
2	0	0	0	0	0
2	3	2	3	2	10
2	5	5	5	5	20
2	1	0	1	0	2
2	0	0	0	0	0
1	0	0	0	0	0
1	0	0	0	0	0
2	0	0	0	0	0
2	4	2	3	3	12
1	0	0	0	0	0
2	0	0	0	0	0
2	1	3	1	2	7
2	1	0	1	2	4
2	1	1	1	1	4
1	4	2	5	3	14
2	1	0	0	2	3
2	2	0	1	2	5
1	0	0	0	0	0
1	0	0	0	0	0
2	1	0	0	1	2
2	0	0	0	0	0
1	2	1	1	2	6
2	4	0	5	5	14
2	1	1	1	1	4
2	0	0	0	0	0
2	1	1	1	1	4
2	0	1	3	1	5
1	1	0	0	0	1
2	0	0	1	0	1
1	3	3	3	3	12
2	2	2	2	1	7
2	2	0	1	0	3
1	2	1	3	4	10
2	0	0	1	0	1
2	3	2	3	3	11
2	2	2	2	1	7
1	0	0	0	0	0
1	3	4	5	3	15
2	0	0	0	1	1
2	1	1	1	2	5
2	0	1	1	1	3
1	0	0	0	0	0
1	1	0	2	1	4
2	2	3	4	1	10
2	0	0	0	0	0
2	2	1	2	2	7
2	1	1	2	1	5
2	0	0	0	0	0
2	0	1	2	1	4
2	0	1	0	1	2
2	0	0	3	1	4
1	1	0	4	5	10
2	1	1	1	1	4
2	1	0	1	2	4
1	0	0	0	0	0
2	0	2	2	1	5
2	1	1	1	2	5
1	2	0	0	2	4
2	3	1	3	3	10
2	0	0	0	0	0
2	1	0	0	0	1
2	0	0	1	1	2
2	1	0	0	1	2
2	0	0	0	0	0
1	1	1	1	2	5
1	3	1	3	2	9
2	1	0	0	0	1
2	0	1	0	0	1
1	4	3	3	3	13
1	0	0	0	0	0
2	0	1	0	0	1
2	0	2	3	1	6
2	2	2	3	2	9
1	0	0	0	0	0
2	1	1	0	0	2
2	1	1	0	2	4
2	0	0	0	0	0
2	1	1	2	2	6
1	0	0	0	0	0
2	1	1	1	3	6
2	1	1	1	1	4
2	1	1	1	1	4
2	0	0	0	2	2
2	3	2	1	2	8
2	0	0	0	1	1
1	4	1	5	3	13
2	1	2	1	2	6
2	1	1	0	1	3
1	0	1	0	0	1
2	0	0	0	0	0
2	0	0	0	0	0
2	0	0	0	0	0
2	1	0	5	0	6
1	1	2	2	2	7
1	3	3	3	3	12
2	0	1	0	1	2
2	2	3	2	1	8
2	2	0	2	3	7
2	0	0	0	0	0
2	1	1	1	3	6
2	1	0	1	2	4
2	0	0	0	0	0
1	2	2	3	2	9
2	2	1	0	3	6
2	2	1	1	1	5
1	0	0	0	0	0
2	2	2	2	3	9
2	1	1	1	2	5
2	1	3	2	2	8
2	5	5	5	5	20
2	1	0	0	1	2
1	1	0	1	0	2
2	0	0	0	0	0
1	0	0	0	0	0
2	0	0	0	0	0
1	3	0	0	0	3
2	2	2	3	2	9
2	0	0	0	1	1
2	2	0	2	2	6
2	0	0	0	0	0
2	1	1	1	0	3
2	3	3	4	4	14
2	0	0	1	1	2
2	2	0	2	0	4
2	5	5	5	1	16
2	2	1	0	0	3
2	2	1	1	0	4
2	0	0	0	0	0
2	2	2	2	1	7
2	2	2	1	1	6
2	0	2	5	5	12
2	0	1	1	0	2
2	1	0	1	2	4
1	0	0	0	0	0
2	1	1	0	1	3
2	0	0	0	1	1
2	0	0	0	0	0
2	2	2	2	2	8
1	0	1	0	2	3
2	0	1	0	0	1
2	0	1	1	1	3
2	1	0	0	1	2
2	0	0	0	0	0
1	1	1	1	1	4
2	4	4	4	4	16
2	0	0	1	1	2
2	2	2	2	2	8
1	0	0	0	0	0
2	2	1	1	3	7
2	2	2	2	2	8
2	0	0	0	0	0
1	0	0	0	0	0
2	0	1	1	2	4
1	1	1	1	1	4
2	2	2	2	2	8
2	0	0	0	0	0
2	0	0	0	0	0
2	1	1	1	1	4
2	0	0	0	0	0
2	1	0	0	0	1
2	0	0	0	5	5
2	0	0	0	0	0
2	3	3	3	4	13
2	1	1	2	1	5
2	0	1	4	1	6
2	1	1	1	0	3
1	1	1	1	1	4
2	3	1	2	2	8
2	3	0	0	0	3
1	1	0	1	0	2
2	0	0	0	0	0
2	0	0	0	1	1
2	0	0	0	0	0
2	1	1	1	1	4
1	0	0	0	5	5
1	2	0	0	0	2
1	0	0	0	0	0
2	1	5	3	3	12
1	1	1	0	0	2
2	0	1	0	3	4
2	2	1	2	1	6
2	1	1	0	0	2
2	0	0	0	0	0
2	0	0	0	0	0
1	1	2	1	3	7
2	0	0	0	0	0
2	0	0	0	0	0
2	3	3	3	2	11
1	2	0	1	3	6
2	0	1	0	1	2
2	1	0	1	0	2
2	4	2	2	4	12
2	3	2	2	2	9
2	1	2	1	0	4
2	2	2	2	3	9
1	2	1	4	2	9
2	1	1	1	2	5
2	1	0	0	0	1
2	1	2	2	1	6
1	1	1	1	1	4
2	0	0	1	1	2
2	1	0	1	2	4
1	1	0	0	0	1
1	0	0	0	0	0
2	0	0	0	0	0
2	4	3	4	3	14
1	0	0	0	0	0
2	1	0	2	1	4
2	3	3	2	3	11
2	1	3	2	3	9
2	0	0	0	2	2
2	1	1	1	1	4
2	5	1	3	3	12
2	1	2	2	4	9
2	0	3	1	0	4
2	1	1	2	0	4
2	4	0	2	4	10
2	0	1	3	2	6
2	1	1	1	1	4
2	4	4	5	2	15
1	3	3	3	2	11
2	0	5	0	0	5
1	4	3	3	3	13
1	3	2	3	5	13
2	0	1	1	1	3
2	1	0	0	0	1
2	1	1	2	1	5
2	1	0	2	1	4
2	2	2	2	1	7
1	0	0	0	0	0
2	2	2	2	2	8
1	5	0	4	3	12
2	1	1	1	1	4
2	2	2	2	3	9
2	1	0	0	0	1
2	4	1	4	2	11
2	0	0	1	1	2
2	0	0	1	0	1
1	2	1	1	2	6
2	0	0	0	1	1
2	0	1	1	1	3
2	4	3	4	3	14
1	1	0	1	1	3
2	2	3	3	3	11
2	2	1	2	2	7
2	2	2	2	2	8
2	3	0	0	2	5
2	2	2	2	4	10
2	0	0	0	0	0
1	1	1	1	1	4
1	0	0	0	2	2
2	1	1	0	2	4
1	0	0	0	0	0
2	3	1	1	3	8
2	5	4	5	4	18
2	1	1	1	1	4
1	0	0	0	0	0
2	0	0	1	1	2
1	3	1	2	3	9
2	2	2	1	1	6
2	0	0	0	0	0
2	2	3	2	4	11
2	3	0	0	0	3
1	4	3	4	3	14
2	1	0	2	2	5
2	2	1	1	1	5
2	1	1	1	2	5
2	0	0	0	0	0
1	1	0	0	1	2
2	0	0	1	2	3
1	4	3	3	2	12
2	0	3	0	0	3
2	0	0	0	2	2
2	0	0	0	0	0
2	0	1	2	1	4
2	1	1	0	2	4
2	1	0	0	0	1
2	3	4	3	3	13
2	2	2	1	2	7
1	0	0	1	0	1
2	1	0	1	2	4
1	0	0	0	0	0
1	1	0	0	3	4
1	0	0	0	0	0
2	1	1	1	1	4
2	1	1	1	1	4
2	0	0	0	0	0
2	0	0	0	2	2
2	2	1	2	1	6
2	1	1	1	1	4
2	1	0	2	2	5
1	1	2	0	2	5
2	3	2	5	2	12
2	0	0	0	2	2
2	1	0	0	1	2
1	2	2	3	1	8
1	0	0	1	1	2
2	0	0	2	3	5
2	0	0	0	0	0
2	0	0	0	0	0
1	0	0	0	0	0
2	1	2	4	3	10
1	0	0	0	0	0
1	0	0	0	0	0
2	0	0	0	0	0
2	1	1	1	1	4
2	1	1	1	1	4
1	0	0	0	0	0
2	0	0	0	0	0
2	0	0	0	0	0
2	1	1	2	2	6
1	2	1	1	1	5
2	4	5	4	2	15
1	4	1	5	4	14
2	0	0	0	1	1
2	3	0	3	2	8
1	1	1	1	1	4
2	2	1	1	1	5
1	1	1	1	1	4
2	2	2	2	2	8
2	2	2	1	3	8
2	0	0	0	0	0
2	0	0	0	0	0
2	0	0	0	1	1
2	2	0	1	2	5
2	2	1	0	2	5
1	0	0	0	0	0
1	0	0	0	1	1
2	0	0	0	0	0
2	1	2	1	3	7
2	5	4	5	5	19
2	1	1	1	1	4
1	0	0	0	0	0
2	0	0	0	0	0
2	1	1	1	1	4
2	3	1	2	3	9
2	3	2	1	2	8
2	1	1	1	1	4
1	1	1	5	1	8
1	1	1	0	0	2
2	3	5	5	1	14
1	0	0	0	2	2
2	0	0	0	0	0
2	1	1	2	5	9
2	1	2	1	1	5
2	0	1	1	0	2
2	0	1	3	2	6
1	1	0	2	2	5
2	1	0	0	1	2
1	0	0	0	0	0
2	2	0	0	2	4
2	1	2	2	2	7
2	4	0	3	2	9
2	2	1	0	5	8
1	1	0	1	1	3
1	0	0	1	4	5
2	0	0	0	0	0
1	1	1	1	1	4
2	1	0	1	1	3
2	3	0	2	4	9
2	1	1	1	1	4
2	2	1	2	3	8
2	0	0	1	0	1
2	1	1	2	2	6
1	2	1	3	2	8
1	2	0	1	3	6
1	1	1	1	1	4
2	1	0	0	0	1
2	1	0	1	3	5
2	0	3	0	2	5
1	5	0	5	4	14
1	0	0	0	0	0
2	0	0	0	0	0
1	0	0	0	0	0
1	0	0	0	1	1
2	3	1	3	2	9
2	1	0	0	2	3
2	1	2	1	1	5
2	0	0	1	1	2
2	2	0	1	1	4
1	1	1	5	3	10
2	0	0	0	0	0
2	3	1	3	2	9
2	0	0	0	0	0
2	0	0	1	0	1
2	1	1	0	0	2
2	3	3	1	1	8
2	0	0	0	0	0
1	1	4	3	2	10
2	2	2	1	3	8
2	0	0	0	0	0
2	1	1	1	1	4
1	0	0	1	1	2
2	1	0	1	1	3
1	0	0	0	0	0
2	0	0	0	5	5
2	0	2	3	1	6
2	0	0	0	1	1
2	2	0	1	2	5
1	0	0	1	0	1
2	0	1	0	3	4
2	0	0	0	0	0
2	1	1	0	1	3
2	1	1	1	1	4
1	0	0	0	0	0
2	3	2	4	3	12
1	1	0	0	2	3
2	3	3	3	1	10
2	0	0	0	0	0
2	0	0	0	0	0
2	1	0	0	2	3
1	0	0	0	0	0
1	1	1	1	1	4
2	1	1	1	1	4
2	1	3	3	2	9
1	0	0	0	0	0
2	0	1	1	2	4
2	1	0	0	1	2
2	2	1	1	1	5
2	2	4	3	3	12
2	1	0	1	1	3
2	0	1	3	2	6
1	0	0	0	0	0
1	0	0	0	1	1
2	1	1	1	1	4
2	3	0	0	0	3
2	1	1	2	0	4
2	3	2	2	3	10
2	5	4	5	5	19
2	1	0	0	0	1
1	0	0	2	5	7
1	0	0	0	1	1
2	1	2	2	2	7
1	1	0	2	0	3
1	0	0	0	3	3
1	0	0	0	3	3
2	0	0	0	2	2
2	1	0	0	2	3
2	1	1	4	3	9
2	1	2	4	3	10
2	1	2	2	4	9
1	0	1	3	1	5
1	1	1	1	2	5
2	2	1	2	5	10
1	0	0	0	0	0
2	0	1	0	1	2
2	1	0	0	0	1
1	1	1	1	1	4
2	1	1	1	1	4
2	2	1	2	0	5
1	0	0	0	1	1
2	1	1	0	0	2
2	3	2	1	5	11
2	1	1	1	1	4
1	1	0	2	1	4
2	2	2	2	4	10
2	1	0	0	1	2
2	1	0	1	1	3
2	2	3	4	3	12
2	2	1	1	1	5
2	1	2	1	1	5
2	2	1	1	0	4
1	1	0	1	0	2
2	3	3	3	3	12
2	0	0	0	3	3
2	1	0	5	1	7
2	0	0	1	0	1
2	1	1	0	0	2
1	1	1	1	1	4
2	2	0	1	2	5
2	1	1	1	1	4
2	3	3	3	2	11
2	0	0	0	1	1
1	1	0	5	0	6
2	0	3	2	1	6
2	0	0	0	0	0
2	0	0	0	1	1
2	1	1	1	1	4
2	0	0	4	1	5
2	4	2	3	3	12
1	3	1	3	3	10
1	1	2	3	1	7
1	3	3	3	3	12
2	1	1	1	1	4
2	1	0	0	0	1
2	0	0	0	0	0
2	1	1	1	1	4
2	0	0	0	0	0
1	0	1	1	1	3
2	0	0	0	0	0
2	1	1	1	0	3
2	1	1	0	0	2
2	0	0	0	2	2
2	1	1	3	3	8
2	1	1	1	1	4
2	0	1	1	1	3
2	1	1	0	3	5
2	0	0	0	0	0
1	0	0	0	1	1
1	0	0	0	0	0
2	1	1	1	1	4
1	0	0	0	0	0
2	1	1	1	1	4
2	2	1	3	3	9
2	0	0	0	0	0
2	1	1	1	1	4
2	1	1	2	0	4
2	1	1	0	0	2
2	0	0	0	2	2
2	1	1	0	1	3
1	4	3	3	4	14
2	0	0	0	0	0
2	3	0	0	2	5
2	0	0	0	0	0
2	0	1	0	1	2
1	0	2	4	5	11
1	2	1	2	2	7
2	0	0	0	0	0
2	0	0	0	0	0
1	0	0	1	1	2
2	1	0	2	2	5
2	2	3	2	3	10
2	0	0	0	5	5
1	0	0	0	0	0
2	1	0	0	0	1
2	1	0	0	1	2
2	0	1	1	0	2
2	3	0	0	3	6
1	2	1	1	2	6
2	1	0	1	1	3
1	0	0	0	1	1
1	1	0	0	0	1
2	1	1	0	1	3
2	0	0	0	0	0
2	0	0	1	1	2
1	0	0	0	0	0
2	3	3	1	5	12
1	0	1	2	2	5
2	1	1	1	1	4
2	1	0	0	2	3
2	0	0	0	0	0
2	0	0	0	2	2
2	0	0	0	0	0
2	0	1	0	1	2
2	2	2	2	3	9
1	1	0	0	1	2
2	1	1	1	1	4
2	0	1	1	2	4
2	2	0	2	0	4
2	1	1	2	2	6
2	1	1	0	1	3
1	4	3	4	2	13
1	0	0	0	0	0
2	0	0	0	3	3
1	0	0	0	0	0
2	5	2	5	5	17
2	1	1	0	0	2
2	0	1	1	1	3
2	1	0	0	1	2
2	1	1	1	1	4
1	1	1	2	2	6
1	0	0	0	1	1
2	1	1	0	2	4
2	1	1	1	1	4
1	0	0	0	0	0
2	2	1	1	2	6
2	1	0	0	1	2
1	1	1	1	1	4
2	0	0	0	0	0
2	1	2	1	1	5
2	1	1	1	1	4
1	0	2	1	1	4
1	4	0	0	0	4
2	1	0	1	1	3
2	4	4	4	4	16
2	0	0	0	1	1
2	2	1	0	3	6
2	1	2	3	3	9
2	0	0	0	0	0
2	2	1	1	1	5
2	1	0	0	1	2
2	0	0	0	0	0
2	2	1	3	1	7
2	0	3	1	3	7
2	0	1	0	0	1
2	1	2	1	3	7
2	2	1	5	2	10
1	0	0	0	0	0
2	1	1	1	1	4
2	0	1	1	0	2
2	1	0	1	3	5
2	1	0	0	2	3
2	1	1	0	3	5
1	1	1	1	1	4
1	1	1	1	1	4
2	1	1	1	0	3
2	2	1	1	3	7
2	0	1	0	0	1
2	1	0	2	2	5
2	1	0	0	1	2
2	3	2	4	3	12
1	2	3	1	1	7
2	0	0	0	0	0
2	0	0	0	0	0
2	3	3	3	2	11
2	1	0	0	2	3
2	2	0	1	1	4
2	0	0	0	0	0
2	1	1	2	0	4
1	0	0	5	3	8
1	0	2	3	3	8
2	1	1	1	1	4
2	0	0	0	0	0
2	1	0	0	0	1
2	1	3	2	2	8
2	0	0	0	0	0
1	0	0	0	0	0
1	1	0	1	1	3
2	1	1	2	2	6
1	3	2	3	2	10
1	0	0	0	0	0
2	1	1	1	0	3
2	0	0	0	0	0
2	4	2	3	2	11
2	1	0	0	1	2
1	1	1	2	2	6
1	0	1	0	0	1
1	1	1	1	2	5
1	3	2	3	4	12
1	0	0	0	0	0
1	3	3	4	2	12
2	2	2	2	3	9
2	1	1	0	2	4
2	1	1	4	3	9
2	0	0	0	1	1
2	0	0	0	0	0
2	0	0	0	0	0
2	1	0	0	0	1
1	0	1	0	0	1
2	3	1	2	1	7
1	0	0	0	1	1
2	3	2	1	3	9
2	1	0	1	1	3
2	0	0	0	1	1
2	0	1	3	0	4
1	3	2	1	1	7
2	3	3	2	4	12
2	1	0	1	1	3
2	1	1	1	1	4
2	0	0	0	1	1
1	0	0	0	0	0
2	0	0	0	0	0
2	3	2	2	3	10
2	0	0	0	0	0
2	0	0	0	0	0
2	1	0	1	1	3
2	0	0	0	0	0
2	1	1	0	1	3
1	1	0	0	1	2
1	2	0	0	0	2
2	1	1	1	1	4
2	1	3	2	5	11
2	2	3	3	4	12
1	2	3	2	4	11
1	0	0	5	0	5
2	1	1	2	2	6
2	1	0	0	0	1
2	1	1	1	1	4
2	2	2	1	2	7
2	1	1	0	1	3
2	1	1	1	3	6
2	2	2	2	3	9
2	1	2	0	1	4
1	3	1	1	2	7
1	1	1	1	1	4
2	3	3	3	2	11
2	3	0	2	0	5
2	2	0	1	3	6
2	1	0	1	1	3
2	2	0	0	5	7
1	4	1	4	4	13
1	1	0	0	2	3
2	1	0	0	2	3
2	1	1	1	2	5
2	0	0	0	0	0
2	0	0	0	0	0
2	1	1	0	0	2
2	0	0	0	3	3
2	2	0	1	0	3
2	0	0	0	1	1
2	0	0	0	1	1
1	3	4	3	5	15
2	2	1	3	3	9
2	0	0	0	0	0
1	0	0	1	0	1
1	1	1	1	0	3
2	0	2	3	2	7
1	4	4	4	5	17
2	1	0	1	2	4
1	0	0	2	0	2
2	4	4	2	1	11
2	0	0	0	1	1
2	1	2	2	1	6
1	0	0	0	2	2
2	1	1	0	1	3
2	1	1	0	1	3
2	0	1	0	3	4
2	3	3	4	4	14
2	1	1	1	1	4
2	1	0	0	1	2
2	5	0	1	1	7
1	0	0	0	0	0
2	2	0	1	1	4
2	0	0	1	1	2
1	1	0	0	0	1
2	2	0	1	1	4
1	1	0	0	1	2
2	1	1	0	2	4
1	1	1	1	1	4
2	1	1	1	1	4
2	0	0	0	1	1
1	0	0	0	0	0
2	1	0	0	0	1
2	1	2	1	1	5
2	1	0	0	0	1
2	5	5	5	5	20
1	0	1	1	1	3
2	2	1	1	4	8
2	2	4	2	2	10
2	0	1	0	0	1
2	4	3	4	3	14
2	1	2	2	1	6
2	0	1	1	1	3
1	0	0	0	1	1
2	4	0	1	3	8
1	0	0	0	0	0
1	3	0	0	3	6
1	0	0	0	0	0
1	1	1	1	1	4
2	1	2	2	2	7
2	1	1	0	3	5
2	0	0	0	1	1
2	2	1	2	3	8
1	1	3	2	0	6
2	3	2	2	2	9
1	0	0	0	0	0
2	1	1	1	1	4
2	1	1	1	0	3
2	2	1	2	1	6
2	1	0	0	0	1
2	0	0	0	0	0
2	0	0	0	0	0
1	1	0	0	0	1
1	0	0	0	2	2
2	2	2	0	2	6
1	0	1	0	0	1
2	0	0	0	0	0
2	1	2	5	3	11
2	3	5	5	5	18
2	0	0	5	1	6
2	0	0	0	0	0
2	0	0	0	1	1
2	0	0	0	0	0
1	2	2	2	2	8
2	3	3	4	5	15
2	0	0	1	0	1
1	1	1	1	0	3
1	3	2	4	5	14
2	0	1	4	2	7
1	1	1	1	1	4
1	4	3	5	4	16
2	1	3	3	2	9
2	0	0	2	5	7
1	4	3	4	4	15
2	0	0	0	2	2
2	1	1	1	2	5
2	2	1	0	2	5
2	2	2	4	4	12
1	0	0	0	0	0
1	0	0	0	0	0
2	2	0	1	0	3
2	1	1	0	0	2
2	1	1	1	1	4
2	0	0	0	0	0
2	2	1	2	2	7
2	0	0	0	0	0
2	2	1	1	0	4
2	0	0	0	0	0
1	4	0	4	1	9
2	2	2	3	4	11
2	1	1	0	1	3
2	0	0	0	0	0
2	2	2	2	2	8
1	0	0	0	0	0
2	1	0	2	1	4
2	1	0	1	0	2
2	0	1	2	1	4
2	0	0	0	1	1
2	1	0	2	1	4
1	0	0	0	1	1
2	0	0	0	0	0
2	2	2	2	2	8
1	3	0	3	3	9
2	2	2	2	1	7
2	0	0	0	1	1
1	0	0	1	0	1
2	2	1	1	1	5
1	0	0	0	0	0
2	2	0	3	5	10
2	2	2	2	0	6
2	1	2	1	2	6
1	3	1	2	3	9
2	1	1	0	0	2
2	0	0	0	1	1
2	1	0	0	2	3
2	0	0	0	1	1
2	0	0	5	0	5
2	1	0	0	2	3
2	0	0	0	0	0
1	1	0	0	0	1
1	0	1	1	0	2
2	1	0	0	0	1
2	0	0	0	0	0
1	0	0	0	0	0
2	4	4	4	4	16
1	0	0	0	1	1
2	0	0	0	0	0
2	2	1	3	2	8
2	2	2	3	2	9
2	0	0	0	0	0
2	1	0	0	1	2
2	1	0	1	1	3
2	1	0	0	1	2
2	5	1	1	4	11
2	1	1	1	1	4
2	1	0	0	2	3
2	1	0	0	0	1
2	5	0	5	5	15
1	0	1	5	0	6
2	0	1	0	0	1
1	1	1	1	2	5
2	1	1	0	0	2
1	5	1	5	4	15
2	2	2	4	2	10
2	0	1	4	0	5
2	0	0	1	5	6
2	0	1	1	0	2
2	1	3	3	2	9
1	2	3	2	3	10
2	0	0	1	1	2
2	0	1	0	0	1
2	2	2	1	1	6
1	0	0	3	0	3
2	2	0	0	0	2
2	2	1	1	0	4
2	1	1	2	1	5
2	0	0	0	1	1
2	2	0	2	2	6
1	5	2	2	4	13
2	3	1	0	0	4
2	3	1	2	1	7
1	0	1	0	0	1
2	1	0	1	0	2
1	0	1	0	1	2
2	1	1	0	1	3
2	0	1	2	1	4
1	3	1	0	3	7
2	0	1	0	3	4
2	1	2	3	2	8
2	0	0	0	2	2
2	2	3	3	4	12
2	0	0	0	0	0
2	1	0	0	0	1
1	2	2	2	3	9
1	0	0	0	0	0
2	0	0	0	0	0
2	1	1	1	1	4
1	0	0	0	1	1
2	1	2	1	1	5
2	2	1	1	3	7
2	1	1	0	0	2
2	2	1	0	1	4
2	0	0	1	1	2
2	2	2	2	2	8
2	2	2	2	0	6
1	1	2	2	2	7
2	1	1	1	1	4
1	3	0	1	0	4
2	1	1	0	2	4
2	2	1	2	1	6
2	2	4	4	2	12
1	3	3	2	2	10
2	1	2	5	5	13
1	4	2	2	2	10
2	1	0	1	1	3
1	0	0	0	2	2
2	1	1	1	1	4
2	1	1	1	1	4
1	4	0	0	0	4
2	3	1	2	3	9
2	3	3	3	4	13
2	2	1	1	4	8
1	2	2	3	2	9
2	1	1	0	1	3
2	1	1	1	1	4
2	1	1	1	2	5
1	4	3	4	3	14
2	2	1	1	1	5
1	0	1	1	0	2
2	1	0	0	1	2
2	5	5	5	5	20
2	1	0	0	0	1
1	0	0	0	0	0
2	3	2	3	2	10
2	1	1	1	1	4
2	0	0	1	0	1
2	3	2	5	3	13
2	0	1	1	1	3
2	0	0	0	0	0
1	1	0	1	0	2
1	0	1	1	1	3
2	0	0	0	0	0
2	1	0	1	0	2
2	0	0	0	0	0
2	1	0	4	1	6
2	0	0	0	0	0
2	3	1	1	4	9
2	2	1	1	1	5
2	0	2	0	0	2
2	2	0	2	1	5
2	1	2	1	1	5
2	0	0	0	0	0
2	1	0	0	0	1
1	3	0	1	5	9
1	0	0	5	0	5
1	1	1	1	1	4
2	0	1	1	1	3
1	0	0	0	0	0
1	0	0	0	0	0
2	0	0	1	0	1
1	0	0	0	0	0
1	3	1	1	1	6
2	1	1	1	1	4
2	2	1	0	0	3
2	0	0	0	1	1
2	2	0	4	0	6
2	0	0	0	0	0
2	1	2	1	1	5
1	1	2	1	2	6
2	2	2	2	3	9
2	0	0	1	2	3
2	0	0	0	0	0
2	0	0	0	1	1
2	1	1	0	1	3
2	2	1	2	2	7
2	0	1	0	5	6
1	1	1	1	2	5
2	1	3	3	1	8
2	0	0	0	0	0
2	2	0	5	1	8
2	1	2	1	2	6
1	0	0	0	0	0
2	2	2	1	1	6
2	1	2	1	1	5
2	0	0	0	0	0
2	1	0	0	3	4
1	4	0	4	0	8
2	4	2	3	1	10
2	0	1	0	2	3
2	1	1	1	2	5
2	3	2	2	4	11
2	1	1	1	1	4
1	1	0	0	0	1
2	3	1	1	3	8
1	0	0	0	2	2
1	2	2	1	2	7
2	2	2	2	3	9
2	3	1	4	4	12
2	0	0	0	0	0
2	1	1	2	2	6
2	2	1	2	1	6
1	3	1	1	3	8
1	0	0	0	0	0
2	1	0	1	1	3
2	4	3	4	1	12
1	0	0	0	0	0
2	0	1	1	1	3
2	0	1	1	3	5
1	0	0	0	0	0
2	0	0	1	0	1
2	0	1	0	1	2
2	1	0	0	0	1
1	1	1	0	0	2
2	0	0	1	3	4
2	1	1	1	2	5
2	4	1	2	3	10
2	1	0	1	0	2
2	4	3	4	5	16
2	0	0	2	2	4
2	0	0	2	2	4
2	3	0	5	4	12
2	5	0	5	4	14
1	2	2	0	0	4
1	1	1	2	2	6
1	3	3	4	3	13
2	1	1	1	1	4
2	2	1	1	2	6
2	0	1	1	0	2
2	1	1	3	3	8
2	1	0	0	4	5
2	2	2	1	3	8
1	0	0	0	0	0
2	2	2	1	1	6
2	0	1	0	1	2
2	2	0	0	2	4
2	4	3	4	5	16
1	1	0	5	2	8
2	2	1	2	1	6
2	2	0	0	3	5
1	0	0	0	1	1
2	1	0	0	0	1
2	1	1	0	1	3
1	0	1	1	1	3
1	2	2	2	3	9
2	0	0	0	0	0
2	2	3	2	1	8
1	2	1	1	1	5
2	0	1	0	1	2
1	1	1	3	0	5
2	0	0	0	2	2
2	1	1	3	4	9
2	0	1	0	5	6
2	5	0	0	3	8
1	3	4	4	4	15
1	0	0	0	0	0
2	3	1	2	1	7
2	1	0	2	1	4
1	4	0	2	5	11
2	2	1	2	1	6
1	3	1	2	2	8
2	1	0	0	2	3
2	0	1	0	0	1
2	1	1	1	1	4
2	5	3	3	4	15
1	0	0	0	0	0
1	1	0	0	3	4
1	1	1	0	2	4
2	2	0	1	0	3
2	0	0	1	1	2
2	1	0	0	0	1
2	1	0	0	1	2
2	1	1	1	2	5
2	1	0	0	0	1
2	0	0	2	0	2
2	1	0	1	1	3
2	1	3	2	2	8
2	1	0	1	1	3
2	3	0	2	1	6
1	0	0	0	1	1
2	2	2	2	2	8
2	0	1	0	1	2
1	0	0	0	0	0
1	1	0	1	3	5
2	2	0	1	2	5
2	1	0	1	4	6
2	1	1	1	1	4
2	1	0	1	0	2
1	3	1	1	4	9
2	0	0	0	0	0
2	0	1	0	0	1
2	0	0	0	0	0
2	0	0	0	0	0
1	3	2	3	3	11
1	2	0	1	0	3
2	1	0	2	2	5
2	1	1	1	2	5
2	1	1	1	0	3
2	0	0	0	1	1
1	1	1	1	1	4
1	2	2	2	2	8
2	2	2	4	5	13
2	3	0	1	3	7
2	1	1	2	1	5
1	2	1	2	2	7
1	1	1	1	1	4
2	0	0	0	0	0
2	0	1	0	0	1
2	0	1	2	0	3
2	1	1	0	1	3
2	1	0	0	2	3
2	0	0	1	1	2
2	1	0	0	0	1
1	0	1	0	1	2
1	5	3	3	2	13
2	1	0	1	0	2
2	1	1	1	1	4
2	0	0	0	0	0
2	1	1	2	1	5
2	0	0	0	0	0
1	1	1	1	1	4
2	1	1	1	0	3
2	0	0	0	1	1
1	0	0	0	2	2
2	0	1	0	2	3
2	1	1	1	1	4
1	2	0	2	4	8
1	1	1	3	2	7
1	0	0	0	1	1
2	0	0	0	0	0
2	1	1	1	1	4
2	1	0	0	0	1
2	1	2	1	3	7
2	2	0	0	1	3
2	0	1	1	0	2
2	2	2	1	1	6
1	0	0	0	1	1
2	0	1	0	1	2
2	1	0	1	2	4
2	0	0	0	5	5
2	1	1	1	1	4
2	2	1	0	2	5
2	2	1	1	1	5
2	2	3	2	2	9
2	1	0	0	1	2
1	2	2	2	3	9
2	1	1	1	2	5
2	0	0	0	0	0
2	1	0	4	0	5
2	1	0	1	1	3
1	2	0	0	0	2
1	1	1	0	0	2
2	2	2	1	1	6
2	1	0	0	1	2
1	1	1	1	0	3
2	0	4	1	2	7
2	1	0	0	1	2
2	0	1	1	0	2
1	1	1	1	2	5
2	1	0	4	4	9
2	0	0	0	1	1
1	2	0	0	0	2
2	0	1	0	2	3
1	0	0	0	0	0
2	1	0	0	1	2
2	0	1	0	0	1
1	4	1	1	0	6
1	0	0	1	1	2
2	2	0	0	2	4
2	0	1	0	0	1
2	0	0	0	1	1
2	3	0	1	0	4
2	3	2	3	3	11
2	0	1	0	0	1
2	1	0	0	2	3
2	2	2	2	1	7
2	1	1	1	2	5
2	1	1	2	2	6
2	2	2	2	2	8
2	1	1	1	2	5
2	0	0	0	2	2
2	1	1	0	2	4
1	2	1	2	2	7
2	0	0	1	1	2
2	1	1	1	1	4
1	0	1	1	1	3
2	2	1	1	3	7
1	3	3	2	3	11
1	1	1	2	2	6
2	0	2	0	0	2
2	1	1	0	1	3
2	1	1	1	1	4
2	0	0	0	0	0
2	0	1	0	0	1
2	2	2	0	1	5
1	1	1	1	1	4
2	0	0	4	0	4
